# Supplementary material for: Multitrait Bayesian shrinkage and variable selection models with the BGLR-R package
Source: PubMed Central journal article supplement — Genetics. 2022 Aug 4;222(1):iyac112. doi: 10.1093/genetics/iyac112 (PMC9434216; doi:10.1093/genetics/iyac112), 2022-08-04
Supplement: iyac112_supplementary_data_file_s2.pdf [file iyac112_supplementary_data_file_s2.pdf]

## Supplementary S2: Scripts

Paulino Pérez-Rodríguez & Gustavo de los Campos

### Box S1: Multi-trait GBLUP with unstructured and structured covariances

```
 #(Continued from Box 1)

 #Lower triangular elements are stored in column major order in text
 #files, each row corresponds to a realization of a covariance matrix

 #Read file "UN_R.dat"
R<-read.table(file="UN_R.dat",header=FALSE)

 #check number of rows/columns in matrix R, must be 4
rows <- (-1 + sqrt(1 + 8 * ncol(R)))/2
rows

 #Trace and density plots, for some elements e.g, R[1,1], R[4,3]

RowColumnToLinear<-function(n,i,j){
  (n+1)*j-j*(j+1)/2-(n-i)
}

par(mfrow=c(2,2))

whichCol<-RowColumnToLinear(rows,1,1)
plot(R[,whichCol],type="b",main="Trace plot",
     ylab=expression(R[11]),xlab="Thinned iteration")
hist(R[501:1000,whichCol],freq=FALSE,main="Density",
     xlab=expression(R[11]))

whichCol<-RowColumnToLinear(rows,4,3)

plot(R[,whichCol],type="b",main="Trace plot",
     ylab=expression(R[43]),xlab="Thinned iteration")

hist(R[501:1000,whichCol],freq=FALSE,main="Density",
     xlab=expression(R[43]))

 #Read file "UN_Omega_1.dat"
Omega<-read.table(file="UN_Omega_1.dat",header=FALSE)

 #Trace and density plots for some elements, e.g, Omega[3,2], Omega[4,4]

par(mfrow=c(2,2))

whichCol<-RowColumnToLinear(rows,3,2)
```

```

plot(Omega[,whichCol],type="b",main="Trace plot",
     ylab=expression(Omega[32]),xlab="Thinned iteration")
hist(Omega[501:1000,whichCol],freq=FALSE,
     main="Density",xlab=expression(Omega[32]))

whichCol<-RowColumnToLinear(rows,4,4)

plot(Omega[,whichCol],type="b",main="Trace plot",
     ylab=expression(Omega[44]),xlab="Thinned iteration")

hist(Omega[501:1000,whichCol],freq=FALSE,main="Density",
     xlab=expression(Omega[44]))

#See file S3 for resulting figures

```

### Box S2a: Multi-trait GBLUP with structured covariance matrices, recursive and diagonal

```

#(continued from Box 2)

#Read Psi
#each row contains the diagonal elements from PSI
Psi<-read.table(file="REC_DIAG_PSI_1.dat",header=FALSE)

#Trace and density plots for some elements, e.g, Psi[1,1], Psi[3,3]

par(mfrow=c(2,2))

plot(Psi[,1],type="b",main="Trace plot",
     ylab=expression(Psi[11]),xlab="Thinned iteration")
hist(Psi[501:1000,1],freq=FALSE,main="Density",xlab=expression(Psi[11]))

plot(Psi[,3],type="b",main="Trace plot",
     ylab=expression(Psi[33]),xlab="Thinned iteration")
hist(Psi[501:1000,3],freq=FALSE,main="Density",xlab=expression(Psi[33]))

#W
#Only entries set to TRUE in M1 are saved in a row vector
#in consecutive order
W<-read.table(file="REC_DIAG_W_1.dat")

#Trace and density plots for some elements, e.g, W[3,2], W[4,2],
#W[4,3]

par(mfrow=c(3,2))

plot(W[,1],type="b",main="Trace plot",
     ylab=expression(W[32]),xlab="Thinned iteration")
hist(W[501:1000,1],freq=FALSE,main="Density",
     xlab=expression(W[32]))

plot(W[,2],type="b",main="Trace plot",
     ylab=expression(W[42]),xlab="Thinned iteration")
hist(W[501:1000,2],freq=FALSE,main="Density",

```

```

      xlab=expression(W[42]))

plot(W[,3],type="b",main="Trace plot",
      ylab=expression(W[43]),xlab="Thinned iteration")
hist(W[501:1000,3],freq=FALSE,main="Density",
      xlab=expression(W[43]))

#See file S3 for resulting figures

```

### Box S2b: Multi-trait GBLUP with structured covariance matrices, factor analytic and diagonal

```

#(continued from Box 2)

#Regression coefficients for FA
#Only entries set to TRUE in M1 are saved in a row vector
#in consecutive order
W<-read.table(file="FA_DIAG_W_1.dat")

#Trace and density plots for some elements, e.g, W[2,1], W[3,1],
#W[4,1]

par(mfrow=c(3,2))

plot(W[,1],type="b",main="Trace plot",
      ylab=expression(W[21]),xlab="Thinned iteration")
hist(W[501:1000,1],freq=FALSE,main="Density",
      xlab=expression(W[21]))

plot(W[,2],type="b",main="Trace plot",
      ylab=expression(W[31]),xlab="Thinned iteration")
hist(W[501:1000,2],freq=FALSE,main="Density",
      xlab=expression(W[31]))

plot(W[,3],type="b",main="Trace plot",
      ylab=expression(W[41]),xlab="Thinned iteration")
hist(W[501:1000,3],freq=FALSE,main="Density",
      xlab=expression(W[41]))

#See file S3 for resulting figures

```

### Box S3a: Unstructured covariances for markers, pedigree and residual

```

library(BGLR)
data(wheat)

#Compute genomic relationship matrix
M<-scale(wheat.X,center=TRUE)
K1<-tcrossprod(M)/ncol(M)
#Relationship matrix derived from pedigree
K2<-wheat.A

#Define linear predictor

```

```

ETA1<-list(mar=list(K=K1,model="RKHS"),
           ped=list(K=K2,model="RKHS"))

#Fit model
set.seed(1)
fm1<-Multitrait(y=wheat.Y,ETA=ETA1,nIter=10000,burnIn=5000,
               saveAt= "m1_",verbose=FALSE)

#Estimated residual covariance matrix
fm1$resCov

#Estimated Omega_1, equivalent to fm1$ETA[[1]]$Cov
fm1$ETA$mar$Cov

#Estimated Omega_2, equivalent to fm1$ETA[[2]]$Cov
fm1$ETA$ped$Cov

#Predicted u_1
fm1$ETA$mar$u

#Predicted u_2
fm1$ETA$ped$u

#Estimated intercept
fm1$mu

```

### Box S3b: FA for markers + Recursive for pedigree + unstructured residual

```

#Continued from Box S3a
#Define covariance structure for G_1
M1<-matrix(TRUE,nrow=4,ncol=1)
Cov1<-list(type="FA",M=M1)

#Define covariance structure for G_2
M2 <- matrix(nrow = 4, ncol = 4, FALSE)

#Adding recursion from trait 2 onto traits 3 and 4
M2[3, 2] <- TRUE
M2[4, 2] <- TRUE

#Adding recursion from trait 3 onto trait 4
M2[4, 3] <- TRUE
Cov2<-list(type="REC",M=M2)

ETA3<-list(mar=list(K=K1,model="RKHS",Cov=Cov1),
           ped=list(K=K2,model="RKHS",Cov=Cov2))

Res<-list(type="DIAG")

#Fit the model
set.seed(3)
fm3<-Multitrait(y=wheat.Y,ETA=ETA3,nIter=10000,burnIn=5000,
               resCov=Res,saveAt= "m3_",verbose=FALSE)

```

```

#Retrieving results
#Estimated Omega_2
fm3$ETA$ped$Cov

#Estimated W_2
fm3$ETA$ped$Cov$W

#Estimated PSI_2
fm3$ETA$ped$Cov$PSI

```

#### Box S4a: Simulating three traits using the mice data set

```

library(BGLR)

set.seed(195021)

data(mice)
nTraits<-3
nMrk<-1000
nQTL<-12
QTL<-floor(seq(from=10,to=nMrk-9,length=nQTL))

B<-matrix(nrow=nMrk,ncol=nTraits,0)
b<-runif(min=.5,max=1,n=nQTL)
B[QTL[1:6],1]<-b[1:6]
B[QTL[4:9],2]<-b[4:9]
B[QTL[7:12],3]<-b[7:12]

cols<-floor(seq(from=1,to=10000,length=nMrk))
X<-scale(mice.X[,cols],scale=F,center=T)
U<-X%*%B
G0<-cov(U) # realized genomic variance
R0<-diag(diag(G0)*c(9,19,9)) # scales to generate h2
R0[2,1]<-R0[1,2]<-0.5*sqrt(R0[1,1]*R0[2,2])
R0[3,1]<-R0[1,3]<-0.3*sqrt(R0[1,1]*R0[3,3])
R0[3,2]<-R0[2,3]<-0.1*sqrt(R0[2,2]*R0[3,3])

n<-nrow(X)
E<-matrix(nrow=n,ncol=3,rnorm(n*3))%*%chol(R0)

Y<-U+E
INT<-c(120,30,40)
for(i in 1:ncol(Y)){
  #adds intercepts
  Y[,i]<-Y[,i]+INT[i]
}
# Realized heritabilities
apply(FUN=var,X=U,MARGIN=2)/apply(FUN=var,X=Y,MARGIN=2)

```

#### Box S4b: Extracting estimates, and producing posterior plots and summaries for Box 4

```
# (continued from box 4a)

par(mfrow=c(3,1))

for(i in 1:3){
  lab<-expression(paste("P[" ,b[j] !=0, " |data]"))
  main<-paste("Trait",i)
  col<-ifelse(fmSS$ETA[[1]]$d[,i]>=0.8,2, "skyblue")
  pch<-ifelse(fmSS$ETA[[1]]$d[,i]>=0.8,19,1)
  plot(fmSS$ETA[[1]]$d[,i],ylim=0:1,ylab=lab,xlab="SNP",
       col=col, main=main,pch=pch)
  abline(h=0.8,col=8,lty=2)
  abline(v=QTL[1:6+(i-1)*3],lty=2)
}
```

#### Box S4c: Examining posterior probabilities of inclusion within a region

```
# Reading samples of effects saved in binary files
B=readBinMatMultitrait('ETA_1_beta.bin')

# posterior probability of inclusion by SNPs (nearby QTL2)
colMeans(B[,99:101,1]!=0)

# posterior probability that at least one of the 3 has effect !=0
mean(apply(X=B[,99:101,1]!=0,MARGIN=1,FUN=any))

# trace plot by SNP
 #(the plot shows that when one SNP is active, the other two are not)
par(mfrow=c(3,1))
plot(B[,99,1],cex=.5,col=4,type='o')
plot(B[,100,1],cex=.5,col=4,type='o')
plot(B[,101,1],cex=.5,col=4,type='o')
```

#### Box S4d: A more general approach to examine posterior probability of inclusion by region

```
library(BGData)

# Reading samples of effects saved in binary files
B=readBinMatMultitrait('ETA_1_beta.bin')
B=B[-(1:200),,1] # effects for trait 1 removing burn-in

# ETA[[1]]$d report probabilities of inclusion by SNP and trait
# checking for trait 1
plot(colMeans(B!=0),fmSS$ETA[[1]]$d[,1])

# Identifying segments with elevated probability of inclusion
SEGMENTS=segments(chr=rep(1,ncol(B)),
                  bp=1:ncol(B),
                  statistic=1-fmSS$ETA[[1]]$d[,1], # local FDR
                  threshold=0.7,gap=3)

SEGMENTS
```

```

# Plot
plot(fmSS$ETA[[1]]$d[,1],cex=.5,col=4)
points(x=QTL[1:6],y= fmSS$ETA[[1]]$d[QTL[1:6],1],col=2)
abline(v=SEGMENTS['start'],col=8,lty=2)
abline(v=SEGMENTS['end'],col=8,lty=2)

# Computing joint probabilities of inclusion for each discovery
SEGMENTS=cbind(SEGMENTS,segment_prob=NA)
for(i in 1:nrow(SEGMENTS)){
  chunk=SEGMENTS$start[i]:SEGMENTS$end[i]
  SEGMENTS$segment_prob[i]=mean(apply(FUN=any,MARGIN=1,X=B[, chunk,drop=FALSE] !=0))
}

```

#### Box S4e: univariate analysis using BayesC

```

set.seed(123)

par(mfrow=c(3,1))

for(i in 1:3)
{
  saveAt= paste("SSUni_",i,"_",sep="")
  fmSSUni<-BGLR(y=Y[,i],ETA=list(list(X=X,model="BayesC")),
               nIter=12000,burnIn=2000,saveAt=saveAt,
               verbose=FALSE)
  lab<-expression(paste("P[" ,b[j] !=0, " |data]"))
  main<-paste("Trait",i)
  col<-ifelse(fmSSUni$ETA[[1]]$d>=0.8,2, "skyblue")
  pch<-ifelse(fmSSUni$ETA[[1]]$d>=0.8,19,1)
  plot(fmSSUni$ETA[[1]]$d,ylim=0:1,ylab=lab,xlab="SNP",
       col=col, main=main,pch=pch)
  abline(h=0.8,col=8,lty=2)
  abline(v=QTL[1:6+(i-1)*3],lty=2)
}

```

#### Box S5: Estimating Genetic (co)variances in Spike Slab Models (run Box S4a first)

```

#Auxiliary functions

#Genetic covariance matrix
#See Cheng et al., 2018, page 95
#svar sum of variance of columns of the predictors
#if the predictors are centered and standardized
#by columns is equal to number of columns

covBeta<-function(d,Omega,traits,svar){
  Q<-matrix(NA,nrow=traits,ncol=traits)
  for(i in 1:traits){
    Q[i,i]<-Omega[i,i]*sum(d[,i]==1)/nrow(d)
  }

  for(i in 1:traits){

```

```

    for(j in 1:traits){
      if(j<i){
        Q[i,j]<-Q[j,i]<-Omega[i,j]*sum(d[,i]==1 & d[,j]==1)/nrow(d)
      }
    }
  }
  Q<-svar*Q
  return(Q)
}

getGOi<-function(Z,Bi){
  U<-Z%*%Bi
  GOi<-cov(U)
  return(GOi[row(GOi)>=col(GOi)])
}

getGO<-function(X,B){
  q<-dim(B)[3]
  G<-t(apply(FUN=getGOi,X=B,Z=X,MARGIN=1))
  return(G)
}

#Fitting model
Z<-scale(X,center=TRUE, scale=TRUE)/sqrt(ncol(X))

nIter<-35000; burnIn=5000; thin=10
fm<-Multitrait(y=Y,ETA=list(list(X=Z,model='SpikeSlab',
  saveEffects=TRUE,saveIndicators=TRUE)),
  nIter=nIter,burnIn=burnIn,thin=thin,
  verbose=FALSE)

#Omega
fm$ETA[[1]]$Cov$Omega

#Cov between entries of beta
fm$ETA[[1]]$Cov$Sigma

#Method 2, Lehermeier et al., 2017.
#Genomic Variance Estimates: With or without Disequilibrium #Covariances?

B<-readBinMatMultitrait('ETA_1_beta.bin')
B<-B[-(1:(round(burnIn/thin))),,]

xpnd(colMeans(getGO(Z,B)))

#Method 3, Cheng et al., 2018.
#Sum of variance by columns
svar<-sum(apply(X=Z,MARGIN=2,FUN=var))

#Read Omega matrix
Omega<-read.table(file="Omega_1.dat",header=FALSE)
Omega<-as.matrix(Omega)
Omega<-Omega[-(1:(round(burnIn/thin))),,]
d<-readBinMatMultitrait("ETA_1_d.bin.gz",storageMode="single")

```



```

d<-d[-(1:(round(burnIn/thin))),,]

out<-matrix(NA,nrow=nrow(Omega),ncol=ncol(Omega))
for(m in 1:nrow(Omega)){
  O<-xpnd(Omega[m,,drop=TRUE])
  indicator<-d[m,,]
  out[m,]<-vech(covBeta(d[m,,],0,3,svar))
}
xpnd(colMeans(out))

```

### Box S6: Missing value patterns and plotting

```

#Run Box S4a first

#Missing values patterns
patterns<-matrix(NA,nrow=7,ncol=ncol(Y))
patterns[1,]<-c(F,F,T)
patterns[2,]<-c(F,T,F)
patterns[3,]<-c(F,T,T)
patterns[4,]<-c(T,F,F)
patterns[5,]<-c(T,F,T)
patterns[6,]<-c(T,T,F)
patterns[7,]<-c(T,T,T)

set.seed(123)
s<-sample(1:7,size=180,replace=TRUE)
index<-sample(1:nrow(Y),size=180,replace=FALSE)

YNa<-Y

for(i in 1:length(s)){
  YNa[index[i],patterns[s[i],]]<-NA
}

#After fitting the model, the objects $missing_records and $patterns
#can be used to extract the prediction and plotting.
#The following code shows how to plot.

#Missing values for trait 3
whichNa3<-fmG$missing_records[fmG$patterns[,3]]
Y[whichNa3,3] #Observed values
fmG$ETAHat[whichNa3,3] #Predicted values

plot(Y[,3],fmG$ETAHat[,3],
      xlab="Observed value",ylab="Predicted value")
points(Y[whichNa3,3],fmG$ETAHat[whichNa3,3],col="red",pch=19)
legend("bottomright",legend=c("Observed","Missing"),pch=c(1,19),
      col=c("black","red"),bty="n")

```

### Box S7: Benchmark for Bayesian Ridge Regression (Gaussian prior) in BGLR

In order to run the benchmark it is necessary to create two files: a) R script to fit the models (e.g. BRR.R) and a submission script to submit jobs to the queue (e.g. BRR\_R.sub). We assume that data are stored in

matrices  $y$  with 50000 rows and 4 columns and matrix  $X$  with 50000 rows and 50000 columns which are stored in the R file `sampleData.RData`. At the end of the running process the file `times_BRR_R.txt` will contain the running times in seconds for each scenario and replicate. The code in the file `BRR.R` is shown below:

```

args=(commandArgs(TRUE))
for(i in seq_along(args)){
  eval(parse(text=args[[i]]))
}

# reads job ID
jobID <- as.integer(Sys.getenv("SLURM_ARRAY_TASK_ID", "1"))

#Get sample data, y matrix with 50,000 rows and 4 columns
#X matrix with 50,000 rows and 50,000 columns
load('sampleData.RData')

#Load routines for analysis, using version 1.1.0 from github
library(BGLR)

p<-c(5000,10000,20000,50000)
n<-c(5000,10000,20000,50000)
traits<-c(2,3,4)
rep<-1:15

grid<-expand.grid(rep=rep,n=n,p=p,traits=traits)

p<-as.integer(grid$p[jobID])
n<-as.integer(grid$n[jobID])
nTraits<-as.integer(grid$traits[jobID])
replicate<-as.integer(grid$rep[jobID])

W<-X[1:n,1:p]
rm(X)
gc()
y<-y[1:n,1:nTraits]

ETA<-list(list(X=W,model="BRR"))

bglrDir <- paste0(tempfile(pattern = "BGLR-"), "/") # do not save output
dir.create(bglrDir, recursive = TRUE, showWarnings = FALSE)

tmp<-system.time(Multitrait(y=y,ETA=ETA,nIter=1000,burnIn=500,
                           saveAt=bglrDir,verbose=FALSE))[3]
tmp<-as.numeric(tmp)

unlink(bglrDir,recursive=TRUE)

outFile<-paste0("times_BRR_R.txt")
results<-paste(c(n,p,nTraits,replicate,tmp),collapse=' ')

```

The code in the file `BRR_R.sub` is given below:

```

#!/usr/bin/bash --login
#SBATCH --job-name=R_RR_4T

```

```

#SBATCH --time=4:00:00
#SBATCH --cpus-per-task=4
#SBATCH --mem=70gb
#SBATCH --constraint=intel18
#SBATCH --array=1-720

n=$SLURM_ARRAY_TASK_ID

PATH=/mnt/research/quantgen/projects/BGLR/multitrait/opt/R-4.2.0/bin:$PATH
export PATH
export OPENBLAS_NUM_THREADS=4

# run command
R CMD BATCH --no-save --no-restore '--args jobID='$n BRR.R brr_$n

```

### Box S8: Benchmark for Bayesian Ridge Regression (Gaussian prior) using Julia package JWAS

In order to run the benchmark it is necessary to create two files: a) Julia script to fit the models (e.g. BRR.jl) and a submission script to submit jobs to the queue (e.g. BRR\_julia.sub). We assume that data are stored in csv files y.csv with 50000 rows and 5 columns (first column with the ids for individuals, file with headers) and X.csv with 50000 rows and 50001 columns (first column with the ids for individuals, file with headers). At the end of the running process the file times\_BRR\_JWAS.txt will contain the running times in seconds for each scenario and replicate. The code in the file BRR.jl is shown below:

```

#File: BRR.jl
#Benchmark JWAS software
#Requiere: tmpRR folder
#           file times_BRR_JWAS.csv to append results
#           file y.csv
#           file X.csv

#Loading packages
using JWAS
using DataFrames
using CSV
using ArgParse
using LinearAlgebra

#### Command line arguments
s = ArgParseSettings()
@add_arg_table s begin
    "--case"
        help = "case from 1 to 720"
        arg_type=Int
        required=true
end;

parsed_args = parse_args(ARGS, s);

case=parsed_args["case"];
print("case=",case,"\n")

### End of command line arguments

### Setting the number of CPU threads

```

```

BLAS.get_num_threads()

BLAS.set_num_threads(4)

BLAS.get_num_threads()

### End setting the number of CPU threads

#Start reading the data and selecting number of markers and traits based on cases

ps=[5000,10000,20000,50000];
ns=[5000,10000,20000,50000];
ts=[2,3,4];
rs=collect(1:15);
vector = vec(collect(Base.product(rs,ns,ps,ts)));
grid = DataFrame(map(x -> getindex.(vector, x), eachindex(first(vector))));

r=Int(grid[case,1])
n=Int(grid[case,2]);
p=Int(grid[case,3]);
t=Int(grid[case,4]);

print("r=",r,"\n")
print("n=",n,"\n")
print("p=",p,"\n")
print("t=",t,"\n")

pheno=CSV.read("y.csv",DataFrame,delim=",",header=true,missingstrings=["NA"]);

geno=CSV.read("X.csv",DataFrame,delim=",",header=true);

cd("tmpRR")
folder=string("test_",case)
mkdir(folder)
cd(folder)

#add 1 because the first column is animal
geno=geno[:,1:(p+1)];
geno=geno[1:n,:];
genotypes=get_genotypes(geno,quality_control=false,method="RR-BLUP");

pheno=pheno[1:n,:];

start = time();

cnames_pheno=names(pheno);

model_equations=String[]

for i in 2:(t+1)
    print(i,"\n")
    tmp=""
    tmp=string(cnames_pheno[i]," = intercept + genotypes")

```

```

        push!(model_equations,tmp)
end

model_equations=join(model_equations,"; ");

#Build model
model=build_model(model_equations);

out=runMCMC(model,pheno,chain_length=1000,burnin=500)

elapsed= time()-start;
elapsed

#Write results
tmp_folder=pwd()
cd("../..")
output_file=open("times_RR_JWAS.csv","a")
results=string(case,"",n,"",p,"",t,"",r,"",elapsed);
write(output_file,results)
write(output_file,"\n")
close(output_file)
rm(tmp_folder,recursive=true)

```

The code in the file BRR\_julia.sub is given below:

```

#!/usr/bin/bash --login
#SBATCH --job-name=JWAS_RR_4T
#SBATCH --time=04:00:00
#SBATCH --cpus-per-task=4
#SBATCH --mem=70gb
#SBATCH --constraint=intel18
#SBATCH --array=1-720

```

```

PATH=/mnt/research/quantgen/projects/BGLR/multitrait/opt/julia-1.7.2/bin/:$PATH
export PATH

```

```

cd $SLURM_SUBMIT_DIR

```

```

# run command
julia BRR.jl --case $SLURM_ARRAY_TASK_ID

```
